# Supplementary material for: Microplastics in Agricultural Systems: Analytical Methodologies and Effects on Soil Quality and Crop Yield
Source: MDPI journal article supplement (doi:10.3390/agriculture12081162), 2022-08-05
Supplement: s1 [file s1]

## **SUPPLEMENTARY MATERIAL**

# **Microplastics in Agricultural Systems: Analytical Methodologies and Effects on Soil Quality and Crop Yield**

**Raquel Pérez-Reverón <sup>1</sup>, Sergio J. Álvarez-Méndez <sup>2</sup>, Rebecca Magdalena Kropp <sup>1</sup>, Adolfo Perdomo-González <sup>1</sup>, Javier Hernández-Borges <sup>3,4</sup> and Francisco J. Díaz-Peña <sup>1,\*</sup>**

<sup>1</sup> Departamento de Biología Animal, Edafología y Geología, Facultad de Ciencias, Universidad de La Laguna (ULL), Avenida Astrofísico Francisco Sánchez, s/nº, 38206 San Cristóbal de La Laguna, Spain; alu0100948400@ull.edu.es (R.P.-R.); alu0101303093@ull.edu.es (R.M.K.); alu0100708240@ull.edu.es (A.P.-G.)

<sup>2</sup> Instituto Universitario de Bio-Organica Antonio González, Universidad de La Laguna, Avenida. Astrofísico Francisco Sánchez, 38206 San Cristóbal de La Laguna, pain; salvmen@ull.edu.es

<sup>3</sup> Departamento de Química, Unidad Departamental de Química Analítica, Facultad de Ciencias, Universidad de La Laguna (ULL), Avenida Astrofísico Francisco Sánchez, s/nº, 38206 San Cristóbal de La Laguna, Spain; jhborges@ull.edu.es

<sup>4</sup> Instituto Universitario de Enfermedades Tropicales y Salud Pública de Canarias, Universidad de La Laguna (ULL), Avenida Astrofísico Francisco. Sánchez, s/nº, 38206 San Cristóbal de La Laguna, Spain

\* Correspondence: fjdzape@ull.edu.es; Tel.: +34-922-31-6502 (ext. 6420)

## **Index**

|                                                                                                                                                                                                          |   |
|----------------------------------------------------------------------------------------------------------------------------------------------------------------------------------------------------------|---|
| Table S1: Analyzed effects of MPs in the consulted research articles. ....                                                                                                                               | 2 |
| Table S2: Overview with some reviewed analytical methods about separation, identification and quantification of MPs in agricultural soils. ....                                                          | 4 |
| Table S3: Significant growth and biochemical effects observed in MPs exposed plants of agricultural interest compared to control plants.....                                                             | 5 |
| Table S4: Significant growth and biochemical effects of selected experiments in which MPs were exposed to hydroponic or Petri dish grown plants of agricultural interest compared to control plants..... | 8 |
| References .....                                                                                                                                                                                         | 9 |

**Table S1.** Analyzed effects of MPs in the consulted research articles.

| Author (s)                                 | Year | Country        | Analyzed effects   |
|--------------------------------------------|------|----------------|--------------------|
| (Zubris and Richards 2005)                 | 2005 | USA            | Qu                 |
| (Kiyama, Miyahara, and Ohshima 2012)       | 2012 | (-)            | Fa                 |
| (Käppler et al. 2015)                      | 2015 | Germany        | Me                 |
| (Sforzini et al. 2016)                     | 2016 | Italy          | Fa; Ma; Ve         |
| (D. Cao et al. 2017)                       | 2017 | China          | Fa                 |
| (Dehghani, Moore, and Akhbarizadeh 2017)   | 2017 | Iran           | Qu                 |
| (Deng et al. 2017)                         | 2017 | (-)            | Fa                 |
| (Geyer, Jambeck, and Law 2017)             | 2017 | (-)            | Tr                 |
| (Hongfei Liu et al. 2017)                  | 2017 | China          | Ch; Ph             |
| (Hodson et al. 2017)                       | 2017 | United Kingdom | Ch; Fa; Tr         |
| (Horton et al. 2017)                       | 2017 | United Kingdom | Qu                 |
| (Huerta Lwanga, Gertsen, et al. 2017)      | 2017 | (-)            | Fa                 |
| (Huerta Lwanga, Mendoza Vega, et al. 2017) | 2017 | Mexico         | Tr                 |
| (Maaß et al. 2017)                         | 2017 | Germany        | Fa; Tr             |
| (Rillig, Ziersch, and Hempel 2017)         | 2017 | Germany        | Fa; Tr             |
| (Rodriguez-Seijo et al. 2017)              | 2017 | (-)            | Fa                 |
| (D. Zhu, Bi, et al. 2018)                  | 2018 | China          | Ch; Fa; Ma; Tr     |
| (D. Zhu, Chen, et al. 2018)                | 2018 | China          | Ch; Fa; Ma         |
| (David et al. 2018)                        | 2018 | Germany        | Me; Qu             |
| (de Souza Machado et al. 2018)             | 2018 | Germany        | Ph; Ma             |
| (G. S. Zhang and Liu 2018)                 | 2018 | China          | Me; Qu; Tr         |
| (Hurley et al. 2018)                       | 2018 | Norway         | Me                 |
| (Lei et al. 2018)                          | 2018 | China          | Fa                 |
| (M. Liu et al. 2018)                       | 2018 | China          | Qu                 |
| (Piehl et al. 2018)                        | 2018 | Germany        | Qu                 |
| (Qi et al. 2018)                           | 2018 | (-)            | Ag; Fa             |
| (Rodríguez-Seijo et al. 2018)              | 2018 | (-)            | Fa                 |
| (Scheurer and Bigalke 2018)                | 2018 | Switzerland    | Me                 |
| (Watteau et al. 2018)                      | 2018 | France         | Me; Qu             |
| (Weithmann et al. 2018)                    | 2018 | Germany        | Qu; Tr             |
| (Accinelli et al. 2019)                    | 2019 | (-)            | Ch; Ma; Ph; Tr     |
| (Allen et al. 2019)                        | 2019 | France         | Qu; Tr             |
| (Bergmann et al. 2019)                     | 2019 | (-)            | Tr                 |
| (Boots, Russell, and Green 2019)           | 2019 | United Kingdom | Ch; Fa; Ph; Tr; Ve |
| (Corradini et al. 2019)                    | 2019 | Chile          | Me; Qu             |
| (de Souza Machado et al. 2019)             | 2019 | Germany        | Ag; Ph             |
| (Fueser et al. 2019)                       | 2019 | Germany        | Fa                 |
| (G. S. Zhang, Zhang, and Li 2019)          | 2019 | China          | Ph                 |
| (Hüffer et al. 2019)                       | 2019 | Austria        | Ch                 |
| (Ju, Zhu, and Qiao 2019)                   | 2019 | China          | Fa                 |
| (Judy et al. 2019)                         | 2019 | Australia      | Ag; Fa; Ma         |
| (Kim and An 2019)                          | 2019 | Korea          | Fa; Tr             |
| (Lahive et al. 2019)                       | 2019 | United Kingdom | Fa                 |
| (Lv et al. 2019)                           | 2019 | China          | Qu                 |
| (M. Yu et al. 2019)                        | 2019 | (-)            | Fa; T              |
| (Mintenig et al. 2019)                     | 2019 | Germany        | Qu                 |
| (O'Connor et al. 2019)                     | 2019 | (-)            | Tr                 |
| (Rezaei et al. 2019)                       | 2019 | Iran           | Tr                 |
| (Song et al. 2019)                         | 2019 | China          | Fa                 |
| (Y. Huang et al. 2019)                     | 2019 | China          | Ma                 |
| (Y. Zhou, Liu, and Wang 2019)              | 2019 | China          | Qu                 |
| (B. Zhou et al. 2020)                      | 2020 | China          | Qu                 |
| (Barreto, Rillig, and Lindo 2020)          | 2020 | Germany        | Fa                 |
| (Bayo, López-Castellanos, and Olmos 2020)  | 2020 | Spain          | Tr                 |
| (Chai et al. 2020)                         | 2020 | China          | Ch; Ma; Ph         |
| (Crossman et al. 2020)                     | 2020 | Canada         | Qu; Tr             |
| (Du et al. 2020)                           | 2020 | China          | Qu                 |

|                                             |      |                 |                |
|---------------------------------------------|------|-----------------|----------------|
| (Edo et al. 2020)                           | 2020 | Spain           | Qu; Tr         |
| (Kleunen et al. 2020)                       | 2020 | China           | Ve             |
| (L. Ding et al. 2020)                       | 2020 | China           | Qu             |
| (Lozano and Rillig 2020)                    | 2020 | Germany         | Ve             |
| (Ma, Sheng, and O'Connor 2020)              | 2020 | China           | Ch; Ma; Fa     |
| (Mueller et al. 2020)                       | 2020 | Germany         | Fa             |
| (Oliveri Conti et al. 2020)                 | 2020 | Italy           | Qu             |
| (Pignattelli, Broccoli, and Renzi 2020)     | 2020 | Italy           | Ag             |
| (Shaoliang Zhang et al. 2020)               | 2020 | China           | Qu; Tr         |
| (Seeley et al. 2020)                        | 2020 | USA             | Ch; Ma; Ph     |
| (van den Berg et al. 2020)                  | 2020 | Spain           | Qu             |
| (Wu et al. 2020)                            | 2020 | China           | Ag             |
| (Y. Chen et al. 2020)                       | 2020 | China           | Qu             |
| (Y. Huang et al. 2020)                      | 2020 | China           | Qu             |
| (Z. Li, Li, Li, Zhao, et al. 2020)          | 2020 | China           | Ag             |
| (B. Huang et al. 2021)                      | 2021 | China           | Qu             |
| (Beriot et al. 2021)                        | 2021 | Spain           | Fa; Tr         |
| (Choi et al. 2021)                          | 2021 | Korea           | Qu             |
| (Corradini et al. 2021)                     | 2021 | Chile           | Qu             |
| (Fangli Wang, Wang, and Song 2021)          | 2021 | China           | Ag; Ch; Ma; Ph |
| (Fakour et al. 2021)                        | 2021 | Taiwan          | Qu             |
| (G. Xu, Liu, and Yu 2021)                   | 2021 | China           | Ag             |
| (G. Xu, Yang, and Yu 2021)                  | 2021 | China           | Ch; Fa         |
| (Gkoutselis et al. 2021)                    | 2021 | Germany         | Ma             |
| (H. Li et al. 2021)                         | 2021 | China           | Tr             |
| (Harms et al. 2021)                         | 2021 | Germany         | Qu             |
| (Hernández-Arenas et al. 2021)              | 2021 | Spain           | Ag             |
| (J. Wang et al. 2021)                       | 2021 | China           | Qu             |
| (J. Yang, Li, Li, et al. 2021)              | 2021 | China           | Qu             |
| (J. Yang, Li, Zhou, et al. 2021)            | 2021 | China           | Qu             |
| (Katsumi et al. 2021)                       | 2021 | Japan           | Tr             |
| (L. Cao et al. 2021)                        | 2021 | China           | Qu             |
| (L. Yu et al. 2021)                         | 2021 | China           | Tr             |
| (Lian et al. 2021)                          | 2021 | China           | Ag; Ch; Ma; Ph |
| (M. Yang, Huang, Tian, et al. 2021)         | 2021 | China           | Ag             |
| (Meng et al. 2021)                          | 2021 | The Netherlands | Ag             |
| (Pflugmacher et al. 2021)                   | 2021 | (-)             | Ag             |
| (Pignattelli et al. 2021)                   | 2021 | (-)             | Ag             |
| (Radford et al. 2021)                       | 2021 | United Kingdom  | Me             |
| (Ragoobur, Huerta-Lwanga, and Somaroo 2021) | 2021 | Mauritius       | Qu             |
| (Rehm et al. 2021)                          | 2021 | Germany         | Tr             |
| (Ren, Kong, and Ni 2021)                    | 2021 | China           | Qu             |
| (Rondoni et al. 2021)                       | 2021 | Italy           | Fa; Ve         |
| (S. Feng, Lu, and Liu 2021)                 | 2021 | China           | Qu             |
| (Shuxin Li et al. 2021)                     | 2021 | (-)             | Ag             |
| (S. Liu et al. 2021)                        | 2021 | China           | Ag; Ch         |
| (Selonen et al. 2021)                       | 2021 | (-)             | Ch; Fa         |
| (van Schothorst et al. 2021)                | 2021 | Spain           | Qu             |
| (W. Yang, Cheng, Adams, et al. 2021)        | 2021 | (-)             | Ag; Ma; Ph     |
| (X. Chen et al. 2021)                       | 2021 | China           | Ch             |
| (Xiao et al. 2021)                          | 2021 | China           | Ch; Ph         |
| (Yan et al. 2021)                           | 2021 | China           | Ch; Ma         |
| (Zhao, Lozano, and Rillig 2021)             | 2021 | Germany         | Ch; Ma; Ph     |
| (Boughattas et al. 2022)                    | 2022 | Tunisia         | Ch; Fa; Tr     |
| (Chouchene et al. 2022)                     | 2022 | Tunisia         | Qu             |
| (Colzi et al. 2022)                         | 2022 | (-)             | Ve             |
| (Fang Wang et al. 2022)                     | 2022 | China           | Ch; Ma; Ph     |
| (F. Zhu et al. 2022)                        | 2022 | China           | Ch; Ma         |
| (Ferreira-Filipe et al. 2022)               | 2022 | Portugal        | Fa; Ma; Qu     |
| (Gentili et al. 2022)                       | 2022 | Italy           | Ve             |

|                              |      |                |                |
|------------------------------|------|----------------|----------------|
| (Greenfield et al. 2022)     | 2022 | United Kingdom | Ag; Ch; Ma; Ph |
| (Hao Liu et al. 2022)        | 2022 | China          | Qu             |
| (Haixin et al. 2022)         | 2022 | China          | Qu             |
| (Han et al. 2022)            | 2022 | China          | Tr             |
| (J. Ding et al. 2022)        | 2022 | China          | Fa; Ma         |
| (Xiangtao Jiang et al. 2022) | 2022 | China          | Ch; Fa; Tr     |
| (Xiaofeng Jiang et al. 2022) | 2022 | China          | Fa             |
| (K. Chen et al. 2022)        | 2022 | China          | Fa             |
| (L. Xu et al. 2022)          | 2022 | China          | Qu; Tr         |
| (Lang et al. 2022)           | 2022 | China          | Qu; Tr         |
| (Perez et al. 2022)          | 2022 | (-)            | Me             |
| (Pérez-Reverón et al. 2022)  | 2022 | Spain          | Qu             |
| (Rezaei et al. 2022)         | 2022 | Iran           | Tr             |
| (Shitong Li et al. 2022)     | 2022 | China          | Qu             |
| (Shuwu Zhang et al. 2022)    | 2022 | China          | Ch; Fa         |
| (Schell et al. 2022)         | 2022 | Spain          | Qu             |
| (Scopetani et al. 2022)      | 2022 | Finland        | Qu             |
| (X. Feng et al. 2022)        | 2022 | China          | Ch; Ph         |
| (X. Liu et al. 2022)         | 2022 | China          | Qu             |
| (Y. Yang et al. 2022)        | 2022 | China          | Tr             |

(-): Unspecific or non-relevant; Ag: Agricultural interest crops; Ch: Chemical processes; Fa: Fauna; Ma: Microbial activity; Me: Methodology; MP: Microplastic; Ph: Physical processes; Qu: Quantification; Tr: Transport; Ve: Vegetation.

**Table S2.** Overview of some reviewed classifications of MPs particles in agricultural soils.

| Shape                                                        | Size                                                                                      | Reference                            |
|--------------------------------------------------------------|-------------------------------------------------------------------------------------------|--------------------------------------|
| Fiber, fragment, Ffilm, pellet                               | < 1 mm, 1–3 mm and 3–5 mm                                                                 | (M. Liu et al. 2018; Lv et al. 2019) |
| Membrane, alveolar structures, thick electro-dense particles | 0–2 µm, 2–20 µm and 20–50 µm                                                              | (Watteau et al. 2018)                |
| Fiber, film, fragment                                        | 0–5 mm                                                                                    | (B. Zhou et al. 2020)                |
| Fiber, film, fragment, pellet                                | 0–150 µm (fiber width), 0–10 mm (fiber length) and 1.5 mm <sup>2</sup> (particle surface) | (Corradini et al. 2019)              |
| Fiber, fragment, microbead, foam                             | 0.02–0.2 mm, 0.2–0.5 mm, 0.5–1 mm, 1–3 mm and 3–5 mm                                      | (Y. Chen et al. 2020)                |
| Fiber, film, fragment, string                                | 0.05 mm–0.25 mm, 0.25–1 mm and 1–10 mm                                                    | (G. S. Zhang and Liu 2018)           |
| Fiber, fragment, sphere                                      | 1–2 mm, 2–5 mm and > 5 mm                                                                 | (Weithmann et al. 2018)              |
| Fiber, film, fragment                                        | 1–5 mm                                                                                    | (Piehl et al. 2018)                  |
| Fiber, film, fragment, pellet                                | 0–1 mm, 1–2 mm, 2–3 mm, 3–4 mm, 4–5 mm and > 5 mm                                         | (L. Xu et al. 2022)                  |
| Fiber, film, fragment, pellet                                | 100–500 µm, 500 µm–1 mm, 1–2 mm and 2–5 mm                                                | (Haixin et al. 2022)                 |
| Fiber, film, fragment, pellet, foam                          | 0–500 µm, 500–1000 µm and > 1–< 5 mm                                                      | (Xiaofeng Jiang et al. 2022)         |

**Table S3.** Significant growth and biochemical effects observed in MPs exposed plants of agricultural interest compared to control plants.

| Specie                                            | MP                                  | Size (µm)                        | Dose <sup>a</sup>   | Plant significant effects                                                                                                                                                                                                                                                                                                                                                                                                                                                                                                                                                                                                                                                                                                                                                                                                                                                                                                                                                                                                                                                                                                                          | Reference                               |
|---------------------------------------------------|-------------------------------------|----------------------------------|---------------------|----------------------------------------------------------------------------------------------------------------------------------------------------------------------------------------------------------------------------------------------------------------------------------------------------------------------------------------------------------------------------------------------------------------------------------------------------------------------------------------------------------------------------------------------------------------------------------------------------------------------------------------------------------------------------------------------------------------------------------------------------------------------------------------------------------------------------------------------------------------------------------------------------------------------------------------------------------------------------------------------------------------------------------------------------------------------------------------------------------------------------------------------------|-----------------------------------------|
| Barley ( <i>Hordeum vulgare</i> L. cv. L G Flynn) | PE, biodegradable PHBV              | 40–48 and 1–15, respectively     | 0.01                | <p>≈ 8 months field experiment. No differences in height, Chl content, grains per ear and straw, 1000 grain and ear dry weights. PE yield to N<sub>2</sub>O flux and soil moisture decrease.</p> <p>At the end of vegetative stage (46 days after seeding): dose-dependent decrease of dry shoots and roots biomass, dry leaf/root ratio and leaf area for PLA+PBAT; dose-dependent decrease of Chl content for PE and PLA+PBAT; increase of specific root length and nodule for PE and PLA+PBAT (dose-dependent for PE); leaf area increase at 1% and decrease at 0.5% for PE. After full maturation (105 days after seedling): dose-dependent decrease of fruit biomass for PLA+PBAT.</p>                                                                                                                                                                                                                                                                                                                                                                                                                                                        | (Greenfield et al. 2022)                |
| Bean ( <i>Phaseolus vulgaris</i> L.)              | PE, biodegradable PLA+PBAT          | 250–500 (60%) and 500–1000 (40%) | 0.5, 1, 1.5, 2, 2.5 | <p>Measurements at 1 month. Decrease of aerial fresh weight with 1 and 2% of PS (&lt; 25 and 48–150 µm). PS and PE (both 48–150 µm): decrease of Chl, dose-dependent decrease of starch contents, dose-dependent increase of soluble content. PS and PE (both 1%): decrease of Chl, increase of soluble sugar at 48–150 and 150–180 µm sizes but decrease at &lt; 25 µm size. PE 1%: dose-dependent decrease of starch content.</p> <p>Measurements at 7 days. Decrease of the germination rate. Aging-dependent decrease of root, shoot and seedling length, fresh and dry weights, and Chl content. Aging-dependent increase of CAT activity.</p>                                                                                                                                                                                                                                                                                                                                                                                                                                                                                                | (Meng et al. 2021)                      |
| Chinese cabbage ( <i>Brassica chinensis</i> L.)   | PE, PS                              | < 25, 25–48, 48–150, 150–850     | 0.25, 0.5, 1, 2     | <p>Measurements at 6 days. Increase of inhibition of germination percentage, and leaf H<sub>2</sub>O<sub>2</sub>, leaf and root GSH and root AsA concentrations; size-dependent decrease of shoots height; decrease of leaf number; size-dependent increase of root H<sub>2</sub>O<sub>2</sub> and leaf AsA concentrations; no changes in plant total fresh biomass. Treatment x acid rain interactions were found.</p> <p>At 6 days: all MPs increase percentage of inhibition of germination and shoots fresh biomass (except PE for shoots biomass), and decrease shoots height and GSH content; PE and PE + PVC increase H<sub>2</sub>O<sub>2</sub> content, and PE, PVC and PE + PVC decrease AsA content. At 21 days: PE and PP increase percentage of inhibition of germination; PE, PP and PVC decrease shoots biomass and increase GSH content; PE and PVC increase H<sub>2</sub>O<sub>2</sub> content; PVC decrease AsA content; all MPs increase Chl a content; PE, PVC and PP increase Chl b and carotenoids contents; PVC and PP increases aminolaevulinic acid content; PVC increases proline content and PE + PVC decreases it.</p> | (M. Yang, Huang, Tian, et al. 2021)     |
| Cress ( <i>Lepidium sativum</i> L.)               | PC, aged PC (40, 80, 120, 160 days) | 3000                             | 2                   | <p>Measurements at 6 days. Increase of inhibition of germination percentage, and leaf H<sub>2</sub>O<sub>2</sub>, leaf and root GSH and root AsA concentrations; size-dependent decrease of shoots height; decrease of leaf number; size-dependent increase of root H<sub>2</sub>O<sub>2</sub> and leaf AsA concentrations; no changes in plant total fresh biomass. Treatment x acid rain interactions were found.</p>                                                                                                                                                                                                                                                                                                                                                                                                                                                                                                                                                                                                                                                                                                                            | (Pflugmacher et al. 2021)               |
| Cress ( <i>Lepidium sativum</i> L.)               | PET                                 | 5–60, 61–499, 500–3000           | 0.02                | <p>At 6 days: all MPs increase percentage of inhibition of germination and shoots fresh biomass (except PE for shoots biomass), and decrease shoots height and GSH content; PE and PE + PVC increase H<sub>2</sub>O<sub>2</sub> content, and PE, PVC and PE + PVC decrease AsA content. At 21 days: PE and PP increase percentage of inhibition of germination; PE, PP and PVC decrease shoots biomass and increase GSH content; PE and PVC increase H<sub>2</sub>O<sub>2</sub> content; PVC decrease AsA content; all MPs increase Chl a content; PE, PVC and PP increase Chl b and carotenoids contents; PVC and PP increases aminolaevulinic acid content; PVC increases proline content and PE + PVC decreases it.</p>                                                                                                                                                                                                                                                                                                                                                                                                                         | (Pignattelli et al. 2021)               |
| Cress ( <i>Lepidium sativum</i> L.)               | PP, PE, PVC, PE + PVC               | < 125                            | 0.02                | <p>Dose-dependent shoot and root dry biomass decrease. Shoot and root Cd concentration and accumulation.</p>                                                                                                                                                                                                                                                                                                                                                                                                                                                                                                                                                                                                                                                                                                                                                                                                                                                                                                                                                                                                                                       | (Pignattelli, Broccoli, and Renzi 2020) |
| Lettuce ( <i>Lactuca sativa</i> L.)               | PE                                  | 8.68–500                         | 0.1, 1, 10          |                                                                                                                                                                                                                                                                                                                                                                                                                                                                                                                                                                                                                                                                                                                                                                                                                                                                                                                                                                                                                                                                                                                                                    | (Fangli Wang, Wang, and Song 2021)      |

|                                                         |                                                     |                                                               |                                                          |                                                                                                                                                                                                                                                                                                                                                                                                                                                                                                                                             |                                      |
|---------------------------------------------------------|-----------------------------------------------------|---------------------------------------------------------------|----------------------------------------------------------|---------------------------------------------------------------------------------------------------------------------------------------------------------------------------------------------------------------------------------------------------------------------------------------------------------------------------------------------------------------------------------------------------------------------------------------------------------------------------------------------------------------------------------------------|--------------------------------------|
| Lettuce ( <i>Lactuca sativa</i> L.)                     | PVC                                                 | 0.1–18, 18–150                                                | 0.5, 1, 2                                                | Measurements at 3 weeks. Roots: no significant effect on the root activity; size- and dose-dependent increase in roots length, surface area, volume and diameter. Leaves: no changes in MDA, Chl and carotenoids content; size- and dose-dependent increase of SOD.                                                                                                                                                                                                                                                                         | (Z. Li, Li, Li, Zhao, et al. 2020)   |
| Maize ( <i>Zea mays</i> L. cv. ZNT 488 and cv. ZTN 182) | PU                                                  | 4280                                                          | 0.01, 0.1, 1                                             | Measurements at 6 weeks. Increase of plant height, shoot dry biomass, Chl, carotenoids and Pn for cv. ZTN 182 at 1%. Tr increased for ZNT 488 at 0.1 and 1%, for ZTN 182 decreased at 1%. Gs increased for ZNT 488 at 0.1 and 1% and for ZTN 182 at 1%.                                                                                                                                                                                                                                                                                     | (Lian et al. 2021)                   |
| Maize ( <i>Zea mays</i> L. var. Wannuoyihao)            | PE, PLA                                             | 100–154                                                       | 0.1, 1, 10                                               | Measurements 1 month after seed sowing. PE increased and PLA decreased shoot and root dry biomass at 10%. PE and PLA generally increased root Zn content in plants exposed to ZnO, did not change shoot Zn content at 500 mg/kg ZnO, and decreased shoot Zn content at 50 mg/kg. MPs also changed Zn content in plants receiving without ZnO application: at 10%, both MPs decreased shoot Zn content, but PE decreased root Zn content and PLA increased it.                                                                               | (W. Yang, Cheng, Adams, et al. 2021) |
| Rice ( <i>Oryza O. sativa</i> L. II You. 900)           | PS                                                  | 8.5–30.7                                                      | 0.005, 0.025                                             | Farmland experiment for 142 days. No changes in root fresh biomass and length. Decrease of stem fresh biomass and length. Decrease of grain biomass. See original reference for metabolite analysis in leaves.                                                                                                                                                                                                                                                                                                                              | (Wu et al. 2020)                     |
| Soybean ( <i>Glycine max</i> L. Merrill)                | PS                                                  | 0.1, 1, 10, 100                                               | 0.001                                                    | Measurements at 10, 20 and 30 days. Size- and date-dependent increase of MDA content and CAT and POD activity in roots and stems; increase of SOD activity in roots and stems; in leaves, increase of MDA content and size- and date-dependent increase of CAT, SOD and POD activities. PS decreased the uptake of PHE in leaves; size- and date-dependent decrease of PHE in roots and increase in stems.                                                                                                                                  | (G. Xu, Liu, and Yu 2021)            |
| Spring onion ( <i>Allium fistulosum</i> L.)             | PES (fiber); PA (bead); PE, PET, PP, PS (fragments) | 5000, 15–20, 643, 222–258, 647–754, and 547–555, respectively | PES at 0.2, the rest at 2.0                              | Measurements at 40 days. PES, PS, PE, PET, PP: increase root dry biomass, root/leaf dry biomass ratio, onion bulbs dry biomass. PES and PS increase root tissue density. PES, PET and PP decrease bulb water content. PA decrease root/leaf dry biomass ratio, root tissue density, onion bulbs dry biomass, and increase onion bulb water content, leaves biomass and leaf nitrogen content. PES decrease leaf nitrogen content. PES, PET, PP decrease onion bulb water content. All MPs increase root length, and decrease root diameter. | (de Souza Machado et al. 2019)       |
| Tomato ( <i>Lycopersicon esculentum</i> Mill.)          | PET                                                 | 310–2110                                                      | 17 870 ± 2174, 27 821 ± 1357, 47 130 ± 3002 <sup>b</sup> | Measurements after three and a half months of cultivation. No changes in shoot and root length, stem diameter and root/shoot biomass. 27 821 ± 1357 dose led to root and shoot dry biomass increase; 17 870 ± 2174 dose led to shoot dry biomass increase. Decrease of number of mature tomatoes.                                                                                                                                                                                                                                           | (Hernández-Arenas et al. 2021)       |
| Wheat ( <i>Triticum aestivum</i> L. cv. NAU 9918)       | PE                                                  | 200–250                                                       | 0.5, 1, 2, 5, 8                                          | Measurements at 15 days. Dose-dependent increase of root length, aerial and roots fresh weights. PHE concentration in leaves and roots decrease proportionally to increasing amounts of PE. Roots: dose-dependent increase of SOD,                                                                                                                                                                                                                                                                                                          | (S. Liu et al. 2021)                 |

|                                                  |                                                                           |                                                    |                |                                                                                                                                                                                                                                                                                                                                                                                                                                                                                                                                                                                                                                                                                                                                                                                                                                                                                                                                                                                                                                                                                                                                                                                                                                                                                                                                                                                                                                                                                                                                                                                |                     |
|--------------------------------------------------|---------------------------------------------------------------------------|----------------------------------------------------|----------------|--------------------------------------------------------------------------------------------------------------------------------------------------------------------------------------------------------------------------------------------------------------------------------------------------------------------------------------------------------------------------------------------------------------------------------------------------------------------------------------------------------------------------------------------------------------------------------------------------------------------------------------------------------------------------------------------------------------------------------------------------------------------------------------------------------------------------------------------------------------------------------------------------------------------------------------------------------------------------------------------------------------------------------------------------------------------------------------------------------------------------------------------------------------------------------------------------------------------------------------------------------------------------------------------------------------------------------------------------------------------------------------------------------------------------------------------------------------------------------------------------------------------------------------------------------------------------------|---------------------|
| Wheat ( <i>Triticum aestivum</i> L. var. Axe)    | PE, PET, PVC                                                              | 370–2630, 510–2780 and 370–1940, respectively      | 0.5            | CAT and POD activity. Leaves: dose-dependent increase of Chl; 1% PE increases carotenoids content, but 5 and 8% PE decreases it. PHE exacerbates toxic effects of PE. For each MP, three kinds of soils (Kirby Sand, Kirby Clay and Warialda Loam) and three incubation periods (0, 3 and 9 months) were studied. No changes in dry shoot biomass. Germination rate decrease only in Kirby Sand soil after 3-months incubation with PE and after 9-months incubation with PVC. No changes: relative Chl content at 2 months, plant height at 2 and 4 months (61 days and 139 days, respectively) and number of fruits at 4 months (with and without earthworms). With bioplastic: decrease in shoot dry biomass number of leaves, leaf area and stem diameter at 2 months (with and without earthworms), shoot dry biomass at 4 months (with earthworms) and in number of tillers at 4 months (without earthworms). With bioplastic and PE: decrease in root dry biomass at 2 months (without earthworms). Measurements at 28 days. No changes in leaf dry matter content and shoot water content. Shoot dry weight decrease with PVC and PP, dose-dependent decrease with PE and PET. Dose-dependent decrease of root and shoot fresh weight and root dry weight with PVC, PP and PET. Leaf area decrease with PVC and with 0.2% PE. Specific leaf area decreases with PE and with 0.1 and 0.2% PVC. Root water content decreases with 0.1 and 0.2% of PET. Chl content decreases with PE and PVC. See original reference for root, stem and leaf mineral content discussion. | (Judy et al. 2019)  |
| Wheat ( <i>Triticum aestivum</i> L.)             | PE, starch-based biodegradable (Pullulan 37.1%, PET 44.6% and PBT 18.3%). | 50–250 (25%), 250–500 (62.5%) and 500–1000 (12.5%) | 1              |                                                                                                                                                                                                                                                                                                                                                                                                                                                                                                                                                                                                                                                                                                                                                                                                                                                                                                                                                                                                                                                                                                                                                                                                                                                                                                                                                                                                                                                                                                                                                                                | (Qi et al. 2018)    |
| Zucchini ( <i>Cucurbita pepo</i> L. var. Faenza) | PP, PE, PVC, PET                                                          | 40–50                                              | 0.02, 0.1, 0.2 |                                                                                                                                                                                                                                                                                                                                                                                                                                                                                                                                                                                                                                                                                                                                                                                                                                                                                                                                                                                                                                                                                                                                                                                                                                                                                                                                                                                                                                                                                                                                                                                | (Colzi et al. 2022) |

<sup>a</sup> % w/w MP/dry weight soil unless otherwise noted; <sup>b</sup> particles kg<sup>-1</sup> dry weight. AsA: Ascorbic acid; CAT: Catalase; Chl: Chl; cv.: Cultivar; DBP: di-*n*-butyl phthalate; DPPH: 2,2-Diphenyl-1-picrylhydrazyl; Gs: stomatal conductance; GSH: glutathione; H<sub>2</sub>O<sub>2</sub>: Hydrogen peroxide; MDA: Malondialdehyde; MP: Microplastic; PA: Polyamide; PBAT: poly-butylene-adipate-co-terephthalate; PBT: Polybutylene Terephthalate; PE: Polyethylene; PES: Polyester; PET: Polyethylene terephthalate; PHBV: poly(3-hydroxybutyrate-co-3-hydroxyvalerate); PHE: Phenanthrene; PLA: Polylactic acid; Pn: Photosynthetic rate; POD: peroxidase; PP: Polypropylene; PS: Polystyrene; PVC: Polyvinyl chloride; SOD: Superoxide dismutase; Tr: Transient transpiration rate; var.: variety.

**Table S4.** Significant growth and biochemical effects of selected experiments in which MPs were exposed to hydroponic or Petri dish grown plants of agricultural interest compared to control plants.

| Specie                                                      | MP | Size (µm)          | Dose (mg mL <sup>-1</sup> )                                                             | Plant significant effects                                                                                                                                                                                                                                                                                                                                                                                                                                                                                                                                                                                                                                                                                                                                                                                                                                                                             | Reference                          |
|-------------------------------------------------------------|----|--------------------|-----------------------------------------------------------------------------------------|-------------------------------------------------------------------------------------------------------------------------------------------------------------------------------------------------------------------------------------------------------------------------------------------------------------------------------------------------------------------------------------------------------------------------------------------------------------------------------------------------------------------------------------------------------------------------------------------------------------------------------------------------------------------------------------------------------------------------------------------------------------------------------------------------------------------------------------------------------------------------------------------------------|------------------------------------|
| Barley ( <i>Hordeum vulgare</i> )                           | PS | 5.64               | 2000                                                                                    | Measurements at 14 days (hydroponic crop). Roots: increase of O <sub>2</sub> <sup>·-</sup> and H <sub>2</sub> O <sub>2</sub> levels, and the activities of dehydroascorbate reductase, glutathione reductase, adenosine diphosphate-Glucose pyrophosphorylase, fructokinase and phosphofructokinase; decrease of activities of cell wall peroxidase, vacuolar invertase, sucrose synthase, phosphoglucomutase, glucose-6-phosphate dehydrogenase and phosphoglucoisomerase. Leaves: increase trans-zeatin and decrease indole-3-acetic acid, indole-3-butyric acid and dihydrozeatin.                                                                                                                                                                                                                                                                                                                 | (Shuxin Li et al. 2021)            |
| Broad bean ( <i>Vicia faba</i> )                            | PS | 0.1, 5             | 0.01, 0.05, 0.1                                                                         | Measurements at 2 days. Size- and dose-dependent decrease in root length, fresh and dry weight. With 0.1 µm MP, MDA decreased at 0.05 mg mL <sup>-1</sup> but increased at 0.1 mg mL <sup>-1</sup> . Antioxidant enzymes: SOD increase; CAT dose-dependent decrease with 5 µm MP but increase with 0.1 µm MP; and POD increase except for 0.1 µm MP at mg mL <sup>-1</sup> , which decreases.                                                                                                                                                                                                                                                                                                                                                                                                                                                                                                         | (Xiaofeng Jiang et al. 2019)       |
| Cress ( <i>Lepidium sativum</i> )                           | PS | 0.5, 4.8           | 10 <sup>3</sup> , 10 <sup>4</sup> , 10 <sup>5</sup> , 10 <sup>6</sup> , 10 <sup>7</sup> | Reduction of seed germination rate (at 8 h after exposure but not at 24 h). Size-dependent changes of root and shoot length. No changes in Chl contents.                                                                                                                                                                                                                                                                                                                                                                                                                                                                                                                                                                                                                                                                                                                                              | (Bosker et al. 2019)               |
| Cucumber ( <i>Cucumis sativus</i> L.)                       | PS | 0.1, 0.3, 0.5, 0.7 | 0.05                                                                                    | Measurements at 65 days (hydroponic crop). Stem length, internode length of stem, fresh and dry aerial biomass decrease with 0.3 µm MP. H <sub>2</sub> O <sub>2</sub> content increase and SOD activity decrease with 0.7 µm MP. MDA content increase and CAT activity decrease with 0.5 and 0.7 µm MP. Proline level decrease with 0.1 µm MP. POD activity increases and Chl and carotenoids levels decrease with 0.1 and 0.7 µm MP. Soluble proteins increase with 0.3, 0.5 and 0.7 µm MP. Soluble sugar decrease with 0.1, 0.3 and 0.7 µm MP. Vitamin C increase. In old leaves an exposure to 0.7 µm PS led to an Fe increase, whereas 0.5 µm PS conducted to a Zn decrease. In young leaves 0.5 µm PS decreased Fe content; 0.1, 0.3 and 0.7 µm PS increased zinc content; 0.3 and 0.5 µm PS yielded to lower Ca content; and K level decreased under the influence of the four evaluated sizes. | (Z. Li, Li, Li, Zhou, et al. 2020) |
| Lentil ( <i>Lens culinaris</i> )                            | PE | 0.74–4.99          | 0.01, 0.05, 0.1                                                                         | Dose-dependent decrease in germination viability at 2 days and germination rate at 7 days. Decrease in root and shoot lengths, roots and shoots fresh weights, shoots dry weight and dose-dependent roots dry weight at 7 days. Dose-dependent increase of antioxidant enzymes (SOD, CAT), H <sub>2</sub> O <sub>2</sub> , and MDA content at 7 days.                                                                                                                                                                                                                                                                                                                                                                                                                                                                                                                                                 | (De Silva et al. 2022)             |
| Lettuce ( <i>Lactuca sativa</i> L. var. <i>ramosa</i> Hort) | PE | ≈23                | 0.25, 0.5, 1                                                                            | At 14 and 28 days: reduction of growth (fresh and dry weight of leaves and roots, plant height, number of leaves and roots length), photosynthetic parameters (Pn, Gs, Tr, Fv/Fm and ETR, except increase of Ci), Chl content, and Rubisco enzyme activity; increase of H <sub>2</sub> O <sub>2</sub> and O <sub>2</sub> <sup>·-</sup> levels, antioxidant enzymes SOD, CAT, GSH-Px, APX, GR, DHAR, and MDHAR contents, and AsA, GSH and MDA enzyme activity indicators levels. All the effects are strengthened by adding DBP.                                                                                                                                                                                                                                                                                                                                                                       | (Gao, Liu, and Song 2019)          |
| Lettuce ( <i>Lactuca sativa</i> L. var. <i>ramosa</i> Hort) | PS | 0.1–1, > 10        | 0.25, 0.5, 1                                                                            | Seedlings collected at 28 days. Decrease in shoots and roots dry biomass. Increase of oxidative stress (increase of O <sub>2</sub> <sup>·-</sup> , H <sub>2</sub> O <sub>2</sub> and MDA contents in leaves and roots) and antioxidant enzyme activities (increase of activities of SOD, CAT, and GSH-Px in the leaves and roots). All the effects are strengthened by adding DBP.                                                                                                                                                                                                                                                                                                                                                                                                                                                                                                                    | (Gao et al. 2021)                  |
| Onion ( <i>Allium cepa</i> )                                | PS | 0.1                | 0.025, 0.05, 0.1, 0.2, 0.4                                                              | At 3 days. Decrease of root length and mitotic index. Increase of the hydroxyl and O <sub>2</sub> <sup>·-</sup> content, DPPH scavenging activity and lipid peroxidation. Induction of cytogenotoxicity.                                                                                                                                                                                                                                                                                                                                                                                                                                                                                                                                                                                                                                                                                              | (Maity et al. 2020)                |
| Rice ( <i>Oryza sativa</i> L.)                              | PS | 0.2                | 0.0001, 0.01, 1                                                                         | Dose-dependent increase of root length, reduction of antioxidant enzyme activity, induction of expression of genes related to antioxidant enzyme activity in plant roots. No changes in seed germination, bud length and lateral root number.                                                                                                                                                                                                                                                                                                                                                                                                                                                                                                                                                                                                                                                         | (Q. Zhang et al. 2021)             |

AsA: Ascorbic acid; APX: ascorbate oxidase; CAT: Catalase; Chl: Chl; Ci: intercellular CO<sub>2</sub> concentration; DBP: di-*n*-butyl phthalate; DHAR: dehydroascorbate reductase; DPPH: 2,2-Diphenyl-1-



picrylhydrazyl; ETR: Photosynthetic electron transport rate;  $F_v/F_m$ : maximum quantum yield of photosystem II; GR: glutathione reductase; Gs: stomatal conductance; GSH: glutathione; GSH-Px: Glutathione peroxidase;  $H_2O_2$ : Hydrogen peroxide; MDA: Malondialdehyde; MDHAR: monodehydroxyascorbate reductase; MP: Microplastic;  $O_2^{\cdot-}$ : Superoxide radicals; PE: Polyethylene; Pn: Photosynthetic rate; POD: peroxidase; PS: Polystyrene; SOD: Superoxide dismutase; Tr: Transient transpiration rate; var.: variety.

## References

- Accinelli, Cesare, Hamed K. Abbas, W. Thomas Shier, Alberto Vicari, Nathan S. Little, Maria Rosaria Aloise, and Sara Giacomini. 2019. "Degradation of Microplastic Seed Film-Coating Fragments in Soil." *Chemosphere* 226 (July): 645–50. <https://doi.org/10.1016/J.CHEMOSPHERE.2019.03.161>.
- Allen, Steve, Deonie Allen, Vernon R. Phoenix, Gaël Le Roux, Pilar Durántez Jiménez, Anaëlle Simonneau, Stéphane Binet, and Didier Galop. 2019. "Atmospheric Transport and Deposition of Microplastics in a Remote Mountain Catchment." *Nature Geoscience* 12 (5): 339–44. <https://doi.org/10.1038/s41561-019-0335-5>.
- Barreto, Carlos, Matthias C. Rillig, and Zoë Lindo. 2020. "Addition of Polyester in Soil Affects Litter Decomposition Rates but Not Microarthropod Communities." *SOIL ORGANISMS* 92 (2): 109–19.
- Bayo, Javier, Joaquín López-Castellanos, and Sonia Olmos. 2020. "Membrane Bioreactor and Rapid Sand Filtration for the Removal of Microplastics in an Urban Wastewater Treatment Plant." *Marine Pollution Bulletin* 156 (July): 111211. <https://doi.org/10.1016/J.MARPOLBUL.2020.111211>.
- Berg, Pim van den, Esperanza Huerta-Lwanga, Fabio Corradini, and Violette Geissen. 2020. "Sewage Sludge Application as a Vehicle for Microplastics in Eastern Spanish Agricultural Soils." *Environmental Pollution* 261 (June): 114198. <https://doi.org/10.1016/J.ENVPOL.2020.114198>.
- Bergmann, Melanie, Sophia Mützel, Sebastian Pimpke, Mine B. Tekman, Jürg Trachsel, and Gunnar Gerdt. 2019. "White and Wonderful? Microplastics Prevail in Snow from the Alps to the Arctic." *Science Advances* 5 (8). <https://doi.org/10.1126/sciadv.aax1157>.
- Beriot, Nicolas, Joost Peek, Raul Zornoza, Violette Geissen, and Esperanza Huerta Lwanga. 2021. "Low Density-Microplastics Detected in Sheep Faeces and Soil: A Case Study from the Intensive Vegetable Farming in Southeast Spain." *Science of The Total Environment* 755 (February): 142653. <https://doi.org/10.1016/J.SCITOTENV.2020.142653>.
- Boots, Bas, Connor William Russell, and Dannielle Senga Green. 2019. "Effects of Microplastics in Soil Ecosystems: Above and Below Ground." *Environmental Science & Technology* 53 (19): 11496–506. <https://doi.org/10.1021/acs.est.9b03304>.
- Bosker, Thijs, Lotte J. Bouwman, Nadja R. Brun, Paul Behrens, and Martina G. Vijver. 2019. "Microplastics Accumulate on Pores in Seed Capsule and Delay Germination and Root Growth of the Terrestrial Vascular Plant *Lepidium Sativum*." *Chemosphere* 226 (July): 774–81. <https://doi.org/10.1016/J.CHEMOSPHERE.2019.03.163>.
- Boughattas, Iteb, Nesrine Zitouni, Sabrine Hattab, Marouane Mkhini, Omayma Missawi, Sondes Helaoui, Moncef Mokni, Noureddine Bousserhine, and Mohamed Banni. 2022. "Interactive Effects of Environmental Microplastics and 2,4-Dichlorophenoxyacetic Acid (2,4-D) on the Earthworm *Eisenia Andrei*." *Journal of Hazardous Materials* 424 (February): 127578. <https://doi.org/10.1016/J.JHAZMAT.2021.127578>.
- Cao, Dongdong, Xiao Wang, Xianxiang Luo, Guocheng Liu, and Hao Zheng. 2017. "Effects of Polystyrene Microplastics on the Fitness of Earthworms in an Agricultural Soil." *IOP Conference Series: Earth and Environmental Science* 61 (April): 012148. <https://doi.org/10.1088/1755-1315/61/1/012148>.
- Cao, Lu, Di Wu, Peng Liu, Wenyong Hu, Li Xu, Yicheng Sun, Qiumei Wu, et al. 2021. "Occurrence, Distribution and Affecting Factors of Microplastics in Agricultural Soils along the Lower Reaches of Yangtze River, China." *Science of The Total Environment* 794 (November): 148694. <https://doi.org/10.1016/J.SCITOTENV.2021.148694>.
- Chai, Bingwen, Xin Li, Hui Liu, Guining Lu, Zhi Dang, and Hua Yin. 2020. "Bacterial Communities on Soil Microplastic at Guiyu, an E-Waste Dismantling Zone of China." *Ecotoxicology and Environmental Safety* 195 (June): 110521. <https://doi.org/10.1016/J.ECOENV.2020.110521>.
- Chen, Keyi, Ronggui Tang, Yongming Luo, Youchao Chen, Ali El-Naggar, Jianhang Du, Aiai Bu, et al. 2022. "Transcriptomic and Metabolic Responses of Earthworms to Contaminated Soil with Polypropylene and Polyethylene Microplastics at Environmentally Relevant Concentrations." *Journal of Hazardous Materials* 427 (April): 128176. <https://doi.org/10.1016/J.JHAZMAT.2021.128176>.
- Chen, Xian, Xuanning Gu, Lijing Bao, Shanshan Ma, and Yinghui Mu. 2021. "Comparison of Adsorption and Desorption of Triclosan between Microplastics and Soil Particles." *Chemosphere* 263 (January): 127947. <https://doi.org/10.1016/J.CHEMOSPHERE.2020.127947>.
- Chen, Yuling, Yifei Leng, Xiaoning Liu, and Jun Wang. 2020. "Microplastic Pollution in Vegetable Farmlands of Suburb Wuhan, Central China." *Environmental Pollution* 257 (February): 113449. <https://doi.org/10.1016/J.ENVPOL.2019.113449>.
- Choi, Yu Ri, Young-Nam Kim, Jung-Hwan Yoon, Nicholas Dickinson, and Kye-Hoon Kim. 2021. "Plastic Contamination of Forest, Urban, and Agricultural Soils: A Case Study of Yeosu City in the Republic of Korea." *Journal of Soils and Sediments* 21 (5): 1962–73. <https://doi.org/10.1007/s11368-020-02759-0>.

- Chouchene, Khawla, Tommaso Nacci, Francesca Modugno, Valter Castelvetro, and Mohamed Ksibi. 2022. "Soil Contamination by Microplastics in Relation to Local Agricultural Development as Revealed by FTIR, ICP-MS and Pyrolysis-GC/MS." *Environmental Pollution* 303 (June): 119016. <https://doi.org/10.1016/J.ENVPOL.2022.119016>.
- Colzi, Ilaria, Luciana Renna, Elisabetta Bianchi, Maria Beatrice Castellani, Andrea Coppi, Sara Pignattelli, Stefano Loppi, and Cristina Gonnelli. 2022. "Impact of Microplastics on Growth, Photosynthesis and Essential Elements in Cucurbita Pepo L." *Journal of Hazardous Materials* 423 (February): 127238. <https://doi.org/10.1016/J.JHAZMAT.2021.127238>.
- Corradini, Fabio, Francisco Casado, Vanessa Leiva, Esperanza Huerta-Lwanga, and Violette Geissen. 2021. "Microplastics Occurrence and Frequency in Soils under Different Land Uses on a Regional Scale." *Science of The Total Environment* 752 (January): 141917. <https://doi.org/10.1016/J.SCITOTENV.2020.141917>.
- Corradini, Fabio, Pablo Meza, Raúl Eguiluz, Francisco Casado, Esperanza Huerta-Lwanga, and Violette Geissen. 2019. "Evidence of Microplastic Accumulation in Agricultural Soils from Sewage Sludge Disposal." *Science of The Total Environment* 671 (June): 411–20. <https://doi.org/10.1016/J.SCITOTENV.2019.03.368>.
- Crossman, Jill, Rachel R. Hurley, Martyn Futter, and Luca Nizzetto. 2020. "Transfer and Transport of Microplastics from Biosolids to Agricultural Soils and the Wider Environment." *Science of The Total Environment* 724 (July): 138334. <https://doi.org/10.1016/J.SCITOTENV.2020.138334>.
- David, Jan, Zacharias Steinmetz, Jiří Kučerík, and Gabriele E. Schaumann. 2018. "Quantitative Analysis of Poly(Ethylene Terephthalate) Microplastics in Soil via Thermogravimetry–Mass Spectrometry." *Analytical Chemistry* 90 (15): 8793–99. <https://doi.org/10.1021/acs.analchem.8b00355>.
- Dehghani, Sharareh, Farid Moore, and Razegheh Akhbarizadeh. 2017. "Microplastic Pollution in Deposited Urban Dust, Tehran Metropolis, Iran." *Environmental Science and Pollution Research* 24 (25): 20360–71. <https://doi.org/10.1007/s11356-017-9674-1>.
- Deng, Yongfeng, Yan Zhang, Bernardo Lemos, and Hongqiang Ren. 2017. "Tissue Accumulation of Microplastics in Mice and Biomarker Responses Suggest Widespread Health Risks of Exposure." *Scientific Reports* 7 (1): 46687. <https://doi.org/10.1038/srep46687>.
- Ding, Jing, Chenxu Liu, Qifang Chen, Zhaoyun Zhang, Jinglong Han, Aiping Liang, Dong Zhu, Hongtao Wang, Min Lv, and Lingxin Chen. 2022. "Extractable Additives in Microplastics: A Hidden Threat to Soil Fauna." *Environmental Pollution* 294 (February): 118647. <https://doi.org/10.1016/J.ENVPOL.2021.118647>.
- Ding, Ling, Shuaiya Zhang, Xiaoyu Wang, Xiaomei Yang, Chutian Zhang, Yanbing Qi, and Xuetao Guo. 2020. "The Occurrence and Distribution Characteristics of Microplastics in the Agricultural Soils of Shaanxi Province, in North-Western China." *Science of The Total Environment* 720 (June): 137525. <https://doi.org/10.1016/J.SCITOTENV.2020.137525>.
- Du, Chuan, Handong Liang, Zhanping Li, and Jie Gong. 2020. "Pollution Characteristics of Microplastics in Soils in Southeastern Suburbs of Baoding City, China." *International Journal of Environmental Research and Public Health* 17 (3): 845. <https://doi.org/10.3390/ijerph17030845>.
- Edo, Carlos, Miguel González-Pleiter, Francisco Leganés, Francisca Fernández-Piñas, and Roberto Rosal. 2020. "Fate of Microplastics in Wastewater Treatment Plants and Their Environmental Dispersion with Effluent and Sludge." *Environmental Pollution* 259 (April): 113837. <https://doi.org/10.1016/J.ENVPOL.2019.113837>.
- Fakour, Hoda, Shang-Lien Lo, Nathan Thadeo Yoashi, Angelbetter Marselian Massao, Nelson Naboth Lema, Fezile Bethusile Mkhontfo, Patrick Chris Jomalema, et al. 2021. "Quantification and Analysis of Microplastics in Farmland Soils: Characterization, Sources, and Pathways." *Agriculture* 11 (4): 330. <https://doi.org/10.3390/agriculture11040330>.
- Feng, Sansan, Hongwei Lu, and Yunlong Liu. 2021. "The Occurrence of Microplastics in Farmland and Grassland Soils in the Qinghai-Tibet Plateau: Different Land Use and Mulching Time in Facility Agriculture." *Environmental Pollution* 279 (June): 116939. <https://doi.org/10.1016/J.ENVPOL.2021.116939>.
- Feng, Xueying, Quanlong Wang, Yuhuan Sun, Shuwu Zhang, and Fayuan Wang. 2022. "Microplastics Change Soil Properties, Heavy Metal Availability and Bacterial Community in a Pb-Zn-Contaminated Soil." *Journal of Hazardous Materials* 424 (February): 127364. <https://doi.org/10.1016/J.JHAZMAT.2021.127364>.
- Ferreira-Filipe, Diogo A., Ana Paço, Tiago Natal-da-Luz, José Paulo Sousa, Jorge A. Saraiva, Armando C. Duarte, Teresa Rocha-Santos, and Ana L. Patrício Silva. 2022. "Are Mulch Biofilms Used in Agriculture an Environmentally Friendly Solution? - An Insight into Their Biodegradability and Ecotoxicity Using Key Organisms in Soil Ecosystems." *Science of The Total Environment* 828 (July): 154269. <https://doi.org/10.1016/J.SCITOTENV.2022.154269>.
- Fueser, Hendrik, Marie Theres Mueller, Linette Weiss, Sebastian Höss, and Walter Traunsperger. 2019. "Ingestion of Microplastics by Nematodes Depends on Feeding Strategy and Buccal Cavity Size." *Environmental Pollution* 255 (December): 113227. <https://doi.org/10.1016/J.ENVPOL.2019.113227>.
- Gao, Minling, Yu Liu, and Zhengguo Song. 2019. "Effects of Polyethylene Microplastic on the Phytotoxicity of Di-n-Butyl Phthalate in Lettuce (*Lactuca Sativa* L. Var. *Ramosa Hort*)." *Chemosphere* 237 (December): 124482. <https://doi.org/10.1016/J.CHEMOSPHERE.2019.124482>.
- Gao, Minling, Yalei Xu, Yu Liu, Shengli Wang, Chengwei Wang, Youming Dong, and Zhengguo Song. 2021. "Effect of Polystyrene on Di-Butyl Phthalate (DBP) Bioavailability and DBP-Induced Phytotoxicity in Lettuce." *Environmental Pollution* 268 (January): 115870. <https://doi.org/10.1016/J.ENVPOL.2020.115870>.
- Gentili, Rodolfo, Lara Quaglini, Elisa Cardarelli, Sarah Caronni, Chiara Montagnani, and Sandra Citterio. 2022. "Toxic Impact of Soil Microplastics (PVC) on Two Weeds: Changes in Growth, Phenology and Photosynthesis Efficiency." *Agronomy* 12 (5): 1219. <https://doi.org/10.3390/agronomy12051219>.

- Geyer, Roland, Jenna R. Jambeck, and Kara Lavender Law. 2017. "Production, Use, and Fate of All Plastics Ever Made." *Science Advances* 3 (7). <https://doi.org/10.1126/sciadv.1700782>.
- Gkoutselis, Gerasimos, Stephan Rohrbach, Janno Harjes, Martin Obst, Andreas Brachmann, Marcus A. Horn, and Gerhard Rambold. 2021. "Microplastics Accumulate Fungal Pathogens in Terrestrial Ecosystems." *Scientific Reports* 11 (1): 13214. <https://doi.org/10.1038/s41598-021-92405-7>.
- Greenfield, Lucy M., Martine Graf, Saravanan Rengaraj, Rafael Bargiela, Gwion Williams, Peter N. Golyshin, David R. Chadwick, and Davey L. Jones. 2022. "Field Response of N<sub>2</sub>O Emissions, Microbial Communities, Soil Biochemical Processes and Winter Barley Growth to the Addition of Conventional and Biodegradable Microplastics." *Agriculture, Ecosystems & Environment* 336 (September): 108023. <https://doi.org/10.1016/J.AGEE.2022.108023>.
- Haixin, Zhang, Huang Yimei, An Shaoshan, Li Haohao, Deng Xiaoqian, Wang Pan, and Fan Mengyuan. 2022. "Land-Use Patterns Determine the Distribution of Soil Microplastics in Typical Agricultural Areas on the Eastern Qinghai-Tibetan Plateau." *Journal of Hazardous Materials* 426 (March): 127806. <https://doi.org/10.1016/J.JHAZMAT.2021.127806>.
- Han, Naipeng, Qichao Zhao, Hongyi Ao, Hongjuan Hu, and Chenxi Wu. 2022. "Horizontal Transport of Macro- and Microplastics on Soil Surface by Rainfall Induced Surface Runoff as Affected by Vegetations." *Science of The Total Environment* 831 (July): 154989. <https://doi.org/10.1016/J.SCITOTENV.2022.154989>.
- Harms, Ivy Kaye, Tim Diekötter, Saskia Troegel, and Mark Lenz. 2021. "Amount, Distribution and Composition of Large Microplastics in Typical Agricultural Soils in Northern Germany." *Science of The Total Environment* 758 (March): 143615. <https://doi.org/10.1016/J.SCITOTENV.2020.143615>.
- Hernández-Arenas, Ricardo, Ana Beltrán-Sanahuja, Paula Navarro-Quirant, and Carlos Sanz-Lazaro. 2021. "The Effect of Sewage Sludge Containing Microplastics on Growth and Fruit Development of Tomato Plants." *Environmental Pollution* 268 (January): 115779. <https://doi.org/10.1016/J.ENVPOL.2020.115779>.
- Hodson, Mark E., Calum A. Duffus-Hodson, Andy Clark, Miranda T. Prendergast-Miller, and Karen L. Thorpe. 2017. "Plastic Bag Derived-Microplastics as a Vector for Metal Exposure in Terrestrial Invertebrates." *Environmental Science & Technology* 51 (8): 4714–21. <https://doi.org/10.1021/acs.est.7b00635>.
- Horton, Alice A., Alexander Walton, David J. Spurgeon, Elma Lahive, and Claus Svendsen. 2017. "Microplastics in Freshwater and Terrestrial Environments: Evaluating the Current Understanding to Identify the Knowledge Gaps and Future Research Priorities." *Science of The Total Environment* 586 (May): 127–41. <https://doi.org/10.1016/J.SCITOTENV.2017.01.190>.
- Huang, Bin, Leiye Sun, Mengran Liu, Haiyou Huang, Huan He, Fengxia Han, Xiaoxia Wang, Zhixiang Xu, Bei Li, and Xuejun Pan. 2021. "Abundance and Distribution Characteristics of Microplastic in Plateau Cultivated Land of Yunnan Province, China." *Environmental Science and Pollution Research* 28 (2): 1675–88. <https://doi.org/10.1007/s11356-020-10527-3>.
- Huang, Yi, Qin Liu, Weiqian Jia, Changrong Yan, and Jie Wang. 2020. "Agricultural Plastic Mulching as a Source of Microplastics in the Terrestrial Environment." *Environmental Pollution* 260 (May): 114096. <https://doi.org/10.1016/J.ENVPOL.2020.114096>.
- Huang, Yi, Yanran Zhao, Jie Wang, Mengjun Zhang, Weiqian Jia, and Xiao Qin. 2019. "LDPE Microplastic Films Alter Microbial Community Composition and Enzymatic Activities in Soil." *Environmental Pollution* 254 (November): 112983. <https://doi.org/10.1016/J.ENVPOL.2019.112983>.
- Huerta Lwanga, Esperanza, Hennie Gertsen, Harm Gooren, Piet Peters, Tamás Salánki, Martine van der Ploeg, Ellen Besseling, Albert A. Koelmans, and Violette Geissen. 2017. "Incorporation of Microplastics from Litter into Burrows of Lumbricus Terrestris." *Environmental Pollution* 220 (January): 523–31. <https://doi.org/10.1016/J.ENVPOL.2016.09.096>.
- Huerta Lwanga, Esperanza, Jorge Mendoza Vega, Victor Ku Quej, Jesus de los Angeles Chi, Lucero Sanchez del Cid, Cesar Chi, Griselda Escalona Segura, et al. 2017. "Field Evidence for Transfer of Plastic Debris along a Terrestrial Food Chain." *Scientific Reports* 7 (1): 14071. <https://doi.org/10.1038/s41598-017-14588-2>.
- Hüffer, Thorsten, Florian Metzelder, Gabriel Sigmund, Sophie Slawek, Torsten C. Schmidt, and Thilo Hofmann. 2019. "Polyethylene Microplastics Influence the Transport of Organic Contaminants in Soil." *Science of The Total Environment* 657 (March): 242–47. <https://doi.org/10.1016/J.SCITOTENV.2018.12.047>.
- Hurley, Rachel R., Amy L. Lusher, Marianne Olsen, and Luca Nizzetto. 2018. "Validation of a Method for Extracting Microplastics from Complex, Organic-Rich, Environmental Matrices." *Environmental Science & Technology* 52 (13): 7409–17. <https://doi.org/10.1021/acs.est.8b01517>.
- Jiang, Xiangtao, Yini Ma, Lin Wang, Qianqian Chen, and Rong Ji. 2022. "Effects of Nano- and Microplastics on the Bioaccumulation and Distribution of Phenanthrene in the Soil Feeding Earthworm *Metaphire Guillelmi*." *Science of The Total Environment* 834 (August): 155125. <https://doi.org/10.1016/J.SCITOTENV.2022.155125>.
- Jiang, Xiaofeng, Hao Chen, Yuanchen Liao, Ziqi Ye, Mei Li, and Göran Klobučar. 2019. "Ecotoxicity and Genotoxicity of Polystyrene Microplastics on Higher Plant *Vicia Faba*." *Environmental Pollution* 250 (July): 831–38. <https://doi.org/10.1016/J.ENVPOL.2019.04.055>.
- Jiang, Xiaofeng, Yang Yang, Qian Wang, Na Liu, and Mei Li. 2022. "Seasonal Variations and Feedback from Microplastics and Cadmium on Soil Organisms in Agricultural Fields." *Environment International* 161 (March): 107096. <https://doi.org/10.1016/J.ENVINT.2022.107096>.
- Ju, Hui, Dong Zhu, and Min Qiao. 2019. "Effects of Polyethylene Microplastics on the Gut Microbial Community, Reproduction and Avoidance Behaviors of the Soil Springtail, *Folsomia Candida*." *Environmental Pollution* 247 (April): 890–97. <https://doi.org/10.1016/J.ENVPOL.2019.01.097>.

- Judy, Jonathan D., Mike Williams, Adrienne Gregg, Danni Oliver, Anu Kumar, Rai Kookana, and Jason K. Kirby. 2019. "Microplastics in Municipal Mixed-Waste Organic Outputs Induce Minimal Short to Long-Term Toxicity in Key Terrestrial Biota." *Environmental Pollution* 252 (September): 522–31. <https://doi.org/10.1016/j.envpol.2019.05.027>.
- Käppler, Andrea, Frank Windrich, Martin G. J. Löder, Mikhail Malanin, Dieter Fischer, Matthias Labrenz, Klaus-Jochen Eichhorn, and Brigitte Voit. 2015. "Identification of Microplastics by FTIR and Raman Microscopy: A Novel Silicon Filter Substrate Opens the Important Spectral Range below 1300  $\text{cm}^{-1}$  for FTIR Transmission Measurements." *Analytical and Bioanalytical Chemistry* 407 (22): 6791–6801. <https://doi.org/10.1007/s00216-015-8850-8>.
- Katsumi, Naoya, Takasei Kusube, Seiya Nagao, and Hiroshi Okochi. 2021. "The Input–Output Balance of Microplastics Derived from Coated Fertilizer in Paddy Fields and the Timing of Their Discharge during the Irrigation Season." *Chemosphere* 279 (September): 130574. <https://doi.org/10.1016/j.chemosphere.2021.130574>.
- Kim, Shin Woong, and Youn Joo An. 2019. "Soil Microplastics Inhibit the Movement of Springtail Species." *Environment International* 126 (May): 699–706. <https://doi.org/10.1016/j.envint.2019.02.067>.
- Kiyama, Yuya, Kohji Miyahara, and Yasumi Ohshima. 2012. "Active Uptake of Artificial Particles in the Nematode *Caenorhabditis Elegans*." *Journal of Experimental Biology* 215 (7): 1178–83. <https://doi.org/10.1242/jeb.067199>.
- Kleunen, Mark, Anna Brumer, Lisa Gutbrod, and Zhijie Zhang. 2020. "A Microplastic Used as Infill Material in Artificial Sport Turfs Reduces Plant Growth." *PLANTS, PEOPLE, PLANET* 2 (2): 157–66. <https://doi.org/10.1002/ppp3.10071>.
- Lahive, Elma, Alexander Walton, Alice A. Horton, David J. Spurgeon, and Claus Svendsen. 2019. "Microplastic Particles Reduce Reproduction in the Terrestrial Worm *Enchytraeus Crypticus* in a Soil Exposure." *Environmental Pollution* 255 (December): 113174. <https://doi.org/10.1016/j.envpol.2019.113174>.
- Lang, Mengfan, Guyue Wang, Yueyun Yang, Weimin Zhu, Youming Zhang, Zhuozhi Ouyang, and Xuetao Guo. 2022. "The Occurrence and Effect of Altitude on Microplastics Distribution in Agricultural Soils of Qinghai Province, Northwest China." *Science of The Total Environment* 810 (March): 152174. <https://doi.org/10.1016/j.scitotenv.2021.152174>.
- Lei, Lili, Siyu Wu, Shibo Lu, Mengting Liu, Yang Song, Zhenhuan Fu, Huahong Shi, Kathleen M. Raley-Susman, and Defu He. 2018. "Microplastic Particles Cause Intestinal Damage and Other Adverse Effects in Zebrafish *Danio Rerio* and Nematode *Caenorhabditis Elegans*." *Science of The Total Environment* 619–620 (April): 1–8. <https://doi.org/10.1016/j.scitotenv.2017.11.103>.
- Li, Haixiao, Xueqiang Lu, Shiyu Wang, Boyang Zheng, and Yan Xu. 2021. "Vertical Migration of Microplastics along Soil Profile under Different Crop Root Systems." *Environmental Pollution* 278 (June): 116833. <https://doi.org/10.1016/j.envpol.2021.116833>.
- Li, Shitong, Fan Ding, Markus Flury, Zhan Wang, Li Xu, Shuangyi Li, Davey L. Jones, and Jingkuan Wang. 2022. "Macro- and Microplastic Accumulation in Soil after 32 Years of Plastic Film Mulching." *Environmental Pollution* 300 (May): 118945. <https://doi.org/10.1016/j.envpol.2022.118945>.
- Li, Shuxin, Tianya Wang, Junhong Guo, Yuefan Dong, Zongshuai Wang, Lei Gong, and Xiangnan Li. 2021. "Polystyrene Microplastics Disturb the Redox Homeostasis, Carbohydrate Metabolism and Phytohormone Regulatory Network in Barley." *Journal of Hazardous Materials* 415 (August): 125614. <https://doi.org/10.1016/j.jhazmat.2021.125614>.
- Li, Zhenxia, Qingfei Li, Ruijing Li, Yafei Zhao, Jiahui Geng, and Guangyin Wang. 2020. "Physiological Responses of Lettuce (*Lactuca Sativa* L.) to Microplastic Pollution." *Environmental Science and Pollution Research* 27 (24): 30306–14. <https://doi.org/10.1007/s11356-020-09349-0>.
- Li, Zhenxia, Ruijing Li, Qingfei Li, Junguo Zhou, and Guangyin Wang. 2020. "Physiological Response of Cucumber (*Cucumis Sativus* L.) Leaves to Polystyrene Nanoplastics Pollution." *Chemosphere* 255 (September): 127041. <https://doi.org/10.1016/j.chemosphere.2020.127041>.
- Lian, Jiapan, Weitao Liu, Lingzuo Meng, Jiani Wu, Aurang Zeb, Liping Cheng, Yuhang Lian, and Hongwen Sun. 2021. "Effects of Microplastics Derived from Polymer-Coated Fertilizer on Maize Growth, Rhizosphere, and Soil Properties." *Journal of Cleaner Production* 318 (October): 128571. <https://doi.org/10.1016/j.jclepro.2021.128571>.
- Liu, Hao, Xiyuan Wang, Qingdong Shi, Yuying Liu, Haifeng Lei, and Yutong Chen. 2022. "Microplastics in Arid Soils: Impact of Different Cropping Systems (Altay, Xinjiang)." *Environmental Pollution* 303 (June): 119162. <https://doi.org/10.1016/j.envpol.2022.119162>.
- Liu, Hongfei, Xiaomei Yang, Guobin Liu, Chutao Liang, Sha Xue, Hao Chen, Coen J. Ritsema, and Violette Geissen. 2017. "Response of Soil Dissolved Organic Matter to Microplastic Addition in Chinese Loess Soil." *Chemosphere* 185 (October): 907–17. <https://doi.org/10.1016/j.chemosphere.2017.07.064>.
- Liu, Mengting, Shibo Lu, Yang Song, Lili Lei, Jiani Hu, Weiwei Lv, Wenzong Zhou, et al. 2018. "Microplastic and Mesoplastic Pollution in Farmland Soils in Suburbs of Shanghai, China." *Environmental Pollution* 242 (November): 855–62. <https://doi.org/10.1016/j.envpol.2018.07.051>.
- Liu, Shiqi, Jiawei Wang, Jiahui Zhu, Jia Wang, Huiqian Wang, and Xinhua Zhan. 2021. "The Joint Toxicity of Polyethylene Microplastic and Phenanthrene to Wheat Seedlings." *Chemosphere* 282 (November): 130967. <https://doi.org/10.1016/j.chemosphere.2021.130967>.
- Liu, Xiaoning, Na Tang, Wanggan Yang, and Jianbo Chang. 2022. "Microplastics Pollution in the Soils of Various Land-Use Types along Sheshui River Basin of Central China." *Science of The Total Environment* 806 (February): 150620. <https://doi.org/10.1016/j.scitotenv.2021.150620>.
- Lozano, Yudi M., and Matthias C. Rillig. 2020. "Effects of Microplastic Fibers and Drought on Plant Communities." *Environmental Science & Technology* 54 (10): 6166–73. <https://doi.org/10.1021/acs.est.0c01051>.

- Lv, Weiwei, Wenzong Zhou, Shibo Lu, Weiwei Huang, Quan Yuan, Minglu Tian, Weiguang Lv, and Defu He. 2019. "Microplastic Pollution in Rice-Fish Co-Culture System: A Report of Three Farmland Stations in Shanghai, China." *Science of The Total Environment* 652 (February): 1209–18. <https://doi.org/10.1016/J.SCITOTENV.2018.10.321>.
- Ma, Jun, G. Daniel Sheng, and Patrick O'Connor. 2020. "Microplastics Combined with Tetracycline in Soils Facilitate the Formation of Antibiotic Resistance in the Enchytraeus Crypticus Microbiome." *Environmental Pollution* 264 (September): 114689. <https://doi.org/10.1016/j.envpol.2020.114689>.
- Maaß, Stefanie, Daniel Daphi, Anika Lehmann, and Matthias C. Rillig. 2017. "Transport of Microplastics by Two Collembolan Species." *Environmental Pollution* 225 (June): 456–59. <https://doi.org/10.1016/J.ENVPOL.2017.03.009>.
- Maity, Sukhendu, Ankit Chatterjee, Rajkumar Guchhait, Sukanta De, and Kousik Pramanick. 2020. "Cytogenotoxic Potential of a Hazardous Material, Polystyrene Microparticles on Allium Cepa L." *Journal of Hazardous Materials* 385 (March): 121560. <https://doi.org/10.1016/J.JHAZMAT.2019.121560>.
- Meng, Fanrong, Xiaomei Yang, Michel Riksen, Minggang Xu, and Violette Geissen. 2021. "Response of Common Bean (Phaseolus Vulgaris L.) Growth to Soil Contaminated with Microplastics." *Science of The Total Environment* 755 (February): 142516. <https://doi.org/10.1016/J.SCITOTENV.2020.142516>.
- Mintenig, S. M., M. G.J. Löder, S. Primpke, and G. Gerdt. 2019. "Low Numbers of Microplastics Detected in Drinking Water from Ground Water Sources." *Science of The Total Environment* 648 (January): 631–35. <https://doi.org/10.1016/J.SCITOTENV.2018.08.178>.
- Mueller, Marie Theres, Hendrik Fueser, Sebastian Höss, and Walter Traunsperger. 2020. "Species-Specific Effects of Long-Term Microplastic Exposure on the Population Growth of Nematodes, with a Focus on Microplastic Ingestion." *Ecological Indicators* 118 (November): 106698. <https://doi.org/10.1016/J.ECOLIND.2020.106698>.
- O'Connor, David, Shizhen Pan, Zhengtao Shen, Yinan Song, Yuanliang Jin, Wei Min Wu, and Deyi Hou. 2019. "Microplastics Undergo Accelerated Vertical Migration in Sand Soil Due to Small Size and Wet-Dry Cycles." *Environmental Pollution* 249 (June): 527–34. <https://doi.org/10.1016/J.ENVPOL.2019.03.092>.
- Oliveri Conti, Gea, Margherita Ferrante, Mohamed Banni, Claudia Favara, Ilenia Nicolosi, Antonio Cristaldi, Maria Fiore, and Pietro Zuccarello. 2020. "Micro- and Nano-Plastics in Edible Fruit and Vegetables. The First Diet Risks Assessment for the General Population." *Environmental Research* 187 (August): 109677. <https://doi.org/10.1016/J.ENVRES.2020.109677>.
- Pérez-Reverón, Raquel, Javier González-Sálam, Cintia Hernández-Sánchez, Miguel González-Pleiter, Javier Hernández-Borges, and Francisco J. Díaz-Peña. 2022. "Recycled Wastewater as a Potential Source of Microplastics in Irrigated Soils from an Arid-Insular Territory (Fuerteventura, Spain)." *Science of The Total Environment* 817 (April): 152830. <https://doi.org/10.1016/J.SCITOTENV.2021.152830>.
- Perez, Carolina N., Florence Carré, Amélie Hoarau-Belkhiri, Audrey Joris, Pim E.G. Leonards, and Marja H. Lamoree. 2022. "Innovations in Analytical Methods to Assess the Occurrence of Microplastics in Soil." *Journal of Environmental Chemical Engineering* 10 (3): 107421. <https://doi.org/10.1016/J.JECE.2022.107421>.
- Pflugmacher, Stephan, Saila Tallinen, Young Jun Kim, Sanghun Kim, and Maranda Esterhuizen. 2021. "Ageing Affects Microplastic Toxicity over Time: Effects of Aged Polycarbonate on Germination, Growth, and Oxidative Stress of Lepidium Sativum." *Science of The Total Environment* 790 (October): 148166. <https://doi.org/10.1016/J.SCITOTENV.2021.148166>.
- Piehl, Sarah, Anna Leibner, Martin G. J. Löder, Rachid Dris, Christina Bogner, and Christian Laforsch. 2018. "Identification and Quantification of Macro- and Microplastics on an Agricultural Farmland." *Scientific Reports* 8 (1): 17950. <https://doi.org/10.1038/s41598-018-36172-y>.
- Pignattelli, Sara, Andrea Broccoli, Manuela Piccardo, Serena Feline, Antonio Terlizzi, and Monia Renzi. 2021. "Short-Term Physiological and Biometrical Responses of Lepidium Sativum Seedlings Exposed to PET-Made Microplastics and Acid Rain." *Ecotoxicology and Environmental Safety* 208 (January): 111718. <https://doi.org/10.1016/J.ECOENV.2020.111718>.
- Pignattelli, Sara, Andrea Broccoli, and Monia Renzi. 2020. "Physiological Responses of Garden Cress (L. Sativum) to Different Types of Microplastics." *Science of The Total Environment* 727 (July): 138609. <https://doi.org/10.1016/J.SCITOTENV.2020.138609>.
- Qi, Yueling, Xiaomei Yang, Amalia Mejia Pelaez, Esperanza Huerta Lwanga, Nicolas Beriot, Henny Gertsen, Paolina Garbeva, and Violette Geissen. 2018. "Macro- and Micro- Plastics in Soil-Plant System: Effects of Plastic Mulch Film Residues on Wheat (Triticum Aestivum) Growth." *Science of The Total Environment* 645 (December): 1048–56. <https://doi.org/10.1016/J.SCITOTENV.2018.07.229>.
- Radford, Freya, Lina M. Zapata-Restrepo, Alice A. Horton, Malcolm D. Hudson, Peter J. Shaw, and Ian D. Williams. 2021. "Developing a Systematic Method for Extraction of Microplastics in Soils." *Analytical Methods* 13 (14): 1695–1705. <https://doi.org/10.1039/D0AY02086A>.
- Ragoobur, Doorgha, Esperanza Huerta-Lwanga, and Geeta Devi Somaroo. 2021. "Microplastics in Agricultural Soils, Wastewater Effluents and Sewage Sludge in Mauritius." *Science of The Total Environment* 798 (December): 149326. <https://doi.org/10.1016/J.SCITOTENV.2021.149326>.
- Rehm, Raphael, Tabea Zeyer, Arthur Schmidt, and Peter Fiener. 2021. "Soil Erosion as Transport Pathway of Microplastic from Agriculture Soils to Aquatic Ecosystems." *Science of The Total Environment* 795 (November): 148774. <https://doi.org/10.1016/J.SCITOTENV.2021.148774>.
- Ren, Shu Yan, Si Fang Kong, and Hong Gang Ni. 2021. "Contribution of Mulch Film to Microplastics in Agricultural Soil and Surface Water in China." *Environmental Pollution* 291 (December): 118227. <https://doi.org/10.1016/J.ENVPOL.2021.118227>.

- Rezaei, Mahrooz, Sajjad Abbasi, Haniye Pourmahmood, Patryk Oleszczuk, Coen Ritsema, and Andrew Turner. 2022. "Microplastics in Agricultural Soils from a Semi-Arid Region and Their Transport by Wind Erosion." *Environmental Research* 212 (September): 113213. <https://doi.org/10.1016/J.ENVRES.2022.113213>.
- Rezaei, Mahrooz, Michel J.P.M. Riksen, Elham Sirjani, Abdolmajid Sameni, and Violette Geissen. 2019. "Wind Erosion as a Driver for Transport of Light Density Microplastics." *Science of The Total Environment* 669 (June): 273–81. <https://doi.org/10.1016/J.SCITOTENV.2019.02.382>.
- Rillig, Matthias C., Lisa Ziersch, and Stefan Hempel. 2017. "Microplastic Transport in Soil by Earthworms." *Scientific Reports* 7 (1): 1362. <https://doi.org/10.1038/s41598-017-01594-7>.
- Rodriguez-Seijo, A., J. Lourenço, T. A.P. Rocha-Santos, J. da Costa, A. C. Duarte, H. Vala, and R. Pereira. 2017. "Histopathological and Molecular Effects of Microplastics in *Eisenia Andrei* Bouché." *Environmental Pollution* 220 (January): 495–503. <https://doi.org/10.1016/J.ENVPOL.2016.09.092>.
- Rodríguez-Seijo, Andrés, João P. da Costa, Teresa Rocha-Santos, Armando C. Duarte, and Ruth Pereira. 2018. "Oxidative Stress, Energy Metabolism and Molecular Responses of Earthworms (*Eisenia Fetida*) Exposed to Low-Density Polyethylene Microplastics." *Environmental Science and Pollution Research* 25 (33): 33599–610. <https://doi.org/10.1007/s11356-018-3317-z>.
- Rondoni, Gabriele, Elena Chierici, Alberto Agnelli, and Eric Conti. 2021. "Microplastics Alter Behavioural Responses of an Insect Herbivore to a Plant-Soil System." *Science of The Total Environment* 787 (September): 147716. <https://doi.org/10.1016/J.SCITOTENV.2021.147716>.
- Schell, Theresa, Rachel Hurley, Nina T. Buenaventura, Pedro V. Mauri, Luca Nizzetto, Andreu Rico, and Marco Vighi. 2022. "Fate of Microplastics in Agricultural Soils Amended with Sewage Sludge: Is Surface Water Runoff a Relevant Environmental Pathway?" *Environmental Pollution* 293 (January): 118520. <https://doi.org/10.1016/J.ENVPOL.2021.118520>.
- Scheurer, Michael, and Moritz Bigalke. 2018. "Microplastics in Swiss Floodplain Soils." *Environmental Science & Technology* 52 (6): 3591–98. <https://doi.org/10.1021/acs.est.7b06003>.
- Schothorst, Benjamin van, Nicolas Beriot, Esperanza Huerta Lwanga, and Violette Geissen. 2021. "Sources of Light Density Microplastic Related to Two Agricultural Practices: The Use of Compost and Plastic Mulch." *Environments* 8 (4): 36. <https://doi.org/10.3390/environments8040036>.
- Scopetani, Costanza, David Chelazzi, Alessandra Cincinelli, Tania Martellini, Ville Leiniö, and Jukka Pellinen. 2022. "Hazardous Contaminants in Plastics Contained in Compost and Agricultural Soil." *Chemosphere* 293 (April): 133645. <https://doi.org/10.1016/J.CHEMOSPHERE.2022.133645>.
- Seeley, Meredith E., Bongkeun Song, Renia Passie, and Robert C. Hale. 2020. "Microplastics Affect Sedimentary Microbial Communities and Nitrogen Cycling." *Nature Communications* 11 (1): 2372. <https://doi.org/10.1038/s41467-020-16235-3>.
- Selonen, Salla, Andraž Dolar, Anita Jemec Kokalj, Lyndon N.A. Sackey, Tina Skalar, Virginia Cruz Fernandes, Diana Rede, et al. 2021. "Exploring the Impacts of Microplastics and Associated Chemicals in the Terrestrial Environment – Exposure of Soil Invertebrates to Tire Particles." *Environmental Research* 201 (October): 111495. <https://doi.org/10.1016/J.ENVRES.2021.111495>.
- Sforzini, Susanna, Laura Oliveri, Selene Chinaglia, and Aldo Viarengo. 2016. "Application of Biotests for the Determination of Soil Ecotoxicity after Exposure to Biodegradable Plastics." *Frontiers in Environmental Science* 4 (October). <https://doi.org/10.3389/fenvs.2016.00068>.
- Silva, Y. Sanath K. De, Uma Maheswari Rajagopalan, Hirofumi Kadono, and Danyang Li. 2022. "Effects of Microplastics on Lentil (*Lens Culinaris*) Seed Germination and Seedling Growth." *Chemosphere* 303 (September): 135162. <https://doi.org/10.1016/J.CHEMOSPHERE.2022.135162>.
- Song, Yang, Chengjin Cao, Rong Qiu, Jiani Hu, Mengting Liu, Shibo Lu, Huahong Shi, Kathleen M. Raley-Susman, and Defu He. 2019. "Uptake and Adverse Effects of Polyethylene Terephthalate Microplastics Fibers on Terrestrial Snails (*Achatina Fulica*) after Soil Exposure." *Environmental Pollution* 250 (July): 447–55. <https://doi.org/10.1016/j.envpol.2019.04.066>.
- Souza Machado, Anderson Abel de, Chung W. Lau, Werner Kloas, Joana Bergmann, Julien B. Bachelier, Erik Faltin, Roland Becker, Anna S. Görlich, and Matthias C. Rillig. 2019. "Microplastics Can Change Soil Properties and Affect Plant Performance." *Environmental Science & Technology* 53 (10): 6044–52. <https://doi.org/10.1021/acs.est.9b01339>.
- Souza Machado, Anderson Abel de, Chung Wai Lau, Jennifer Till, Werner Kloas, Anika Lehmann, Roland Becker, and Matthias C. Rillig. 2018. "Impacts of Microplastics on the Soil Biophysical Environment." *Environmental Science & Technology* 52 (17): 9656–65. <https://doi.org/10.1021/acs.est.8b02212>.
- Wang, Fang, Yu Wang, Leilei Xiang, Marc Redmile-Gordon, Chenggang Gu, Xinglun Yang, Xin Jiang, and Damià Barceló. 2022. "Perspectives on Ecological Risks of Microplastics and Phthalate Acid Esters in Crop Production Systems." *Soil Ecology Letters* 4 (2): 97–108. <https://doi.org/10.1007/s42832-021-0092-4>.
- Wang, Fangli, Xuexia Wang, and Ningning Song. 2021. "Polyethylene Microplastics Increase Cadmium Uptake in Lettuce (*Lactuca Sativa* L.) by Altering the Soil Microenvironment." *Science of The Total Environment* 784 (August): 147133. <https://doi.org/10.1016/J.SCITOTENV.2021.147133>.
- Wang, Jiao, Jiayao Li, Sitong Liu, Hongyu Li, Xiaochen Chen, Chu Peng, Pingping Zhang, and Xianhua Liu. 2021. "Distinct Microplastic Distributions in Soils of Different Land-Use Types: A Case Study of Chinese Farmlands." *Environmental Pollution* 269 (January): 116199. <https://doi.org/10.1016/J.ENVPOL.2020.116199>.
- Watteau, Françoise, Marie-France Dignac, Adeline Bouchard, Agathe Revallier, and Sabine Houot. 2018. "Microplastic Detection in Soil Amended With Municipal Solid Waste Composts as Revealed by Transmission Electronic Microscopy and Pyrolysis/GC/MS." *Frontiers in Sustainable Food Systems* 2 (December). <https://doi.org/10.3389/fsufs.2018.00081>.

- Weithmann, Nicolas, Julia N. Möller, Martin G. J. Löder, Sarah Piehl, Christian Laforsch, and Ruth Freitag. 2018. "Organic Fertilizer as a Vehicle for the Entry of Microplastic into the Environment." *Science Advances* 4 (4). <https://doi.org/10.1126/sciadv.aap8060>.
- Wu, Xiang, Yao Liu, Shanshan Yin, Keke Xiao, Qiao Xiong, Shijie Bian, Sha Liang, Huijie Hou, Jingping Hu, and Jiakuan Yang. 2020. "Metabolomics Revealing the Response of Rice (*Oryza Sativa* L.) Exposed to Polystyrene Microplastics." *Environmental Pollution* 266 (November): 115159. <https://doi.org/10.1016/j.envpol.2020.115159>.
- Xiao, Mouliang, Muhammad Shahbaz, Yun Liang, Jian Yang, Shuang Wang, David R. Chadwick, Davey Jones, Jianping Chen, and Tida Ge. 2021. "Effect of Microplastics on Organic Matter Decomposition in Paddy Soil Amended with Crop Residues and Labile C: A Three-Source-Partitioning Study." *Journal of Hazardous Materials* 416 (August): 126221. <https://doi.org/10.1016/j.jhazmat.2021.126221>.
- Xu, Guanghui, Yang Liu, and Yong Yu. 2021. "Effects of Polystyrene Microplastics on Uptake and Toxicity of Phenanthrene in Soybean." *Science of The Total Environment* 783 (August): 147016. <https://doi.org/10.1016/j.scitotenv.2021.147016>.
- Xu, Guanghui, Yang Yang, and Yong Yu. 2021. "Size Effects of Polystyrene Microplastics on the Accumulation and Toxicity of (Semi-)Metals in Earthworms." *Environmental Pollution* 291 (December): 118194. <https://doi.org/10.1016/j.envpol.2021.118194>.
- Xu, Li, Xiangbo Xu, Chang Li, Jing Li, Mingxing Sun, and Linxiu Zhang. 2022. "Is Mulch Film Itself the Primary Source of Meso- and Microplastics in the Mulching Cultivated Soil? A Preliminary Field Study with Econometric Methods." *Environmental Pollution* 299 (April): 118915. <https://doi.org/10.1016/j.envpol.2022.118915>.
- Yan, Yuanyuan, Zhanghao Chen, Fengxiao Zhu, Changyin Zhu, Chao Wang, and Cheng Gu. 2021. "Effect of Polyvinyl Chloride Microplastics on Bacterial Community and Nutrient Status in Two Agricultural Soils." *Bulletin of Environmental Contamination and Toxicology* 107 (4): 602–9. <https://doi.org/10.1007/s00128-020-02900-2>.
- Yang, Jie, Lianzhen Li, Ruijie Li, Li Xu, Yichen Shen, Simin Li, Chen Tu, Longhua Wu, Peter Christie, and Yongming Luo. 2021. "Microplastics in an Agricultural Soil Following Repeated Application of Three Types of Sewage Sludge: A Field Study." *Environmental Pollution* 289 (November): 117943. <https://doi.org/10.1016/j.envpol.2021.117943>.
- Yang, Jie, Ruijie Li, Qian Zhou, Lianzhen Li, Yuan Li, Chen Tu, Xinyue Zhao, Kuanxu Xiong, Peter Christie, and Yongming Luo. 2021. "Abundance and Morphology of Microplastics in an Agricultural Soil Following Long-Term Repeated Application of Pig Manure." *Environmental Pollution* 272 (March): 116028. <https://doi.org/10.1016/j.envpol.2020.116028>.
- Yang, Min, Dao You Huang, Ying Bing Tian, Qi Hong Zhu, Quan Zhang, Han Hua Zhu, and Chao Xu. 2021. "Influences of Different Source Microplastics with Different Particle Sizes and Application Rates on Soil Properties and Growth of Chinese Cabbage (*Brassica Chinensis* L.)." *Ecotoxicology and Environmental Safety* 222 (October): 112480. <https://doi.org/10.1016/j.ecoenv.2021.112480>.
- Yang, Weiwei, Peng Cheng, Catharine A. Adams, Shuwu Zhang, Yuhuan Sun, Hongwei Yu, and Fayuan Wang. 2021. "Effects of Microplastics on Plant Growth and Arbuscular Mycorrhizal Fungal Communities in a Soil Spiked with ZnO Nanoparticles." *Soil Biology and Biochemistry* 155 (April): 108179. <https://doi.org/10.1016/j.soilbio.2021.108179>.
- Yang, Yang, Zhen Li, Changrong Yan, Dave Chadwick, Davey L. Jones, Enke Liu, Qin Liu, Runhao Bai, and Wenqing He. 2022. "Kinetics of Microplastic Generation from Different Types of Mulch Films in Agricultural Soil." *Science of The Total Environment* 814 (March): 152572. <https://doi.org/10.1016/j.scitotenv.2021.152572>.
- Yu, Lu, Jiao Di Zhang, Yang Liu, Li Yuan Chen, Shu Tao, and Wen Xin Liu. 2021. "Distribution Characteristics of Microplastics in Agricultural Soils from the Largest Vegetable Production Base in China." *Science of The Total Environment* 756 (February): 143860. <https://doi.org/10.1016/j.scitotenv.2020.143860>.
- Yu, Miao, Martine van der Ploeg, Esperanza Huerta Lwanga, Xiaomei Yang, Shaoliang Zhang, Xiaoyi Ma, Coen J. Ritsema, and Violette Geissen. 2019. "Leaching of Microplastics by Preferential Flow in Earthworm (*Lumbricus Terrestris*) Burrows." *Environmental Chemistry* 16 (1): 31. <https://doi.org/10.1071/EN18161>.
- Zhang, G. S., and Y. F. Liu. 2018. "The Distribution of Microplastics in Soil Aggregate Fractions in Southwestern China." *Science of The Total Environment* 642 (November): 12–20. <https://doi.org/10.1016/j.scitotenv.2018.06.004>.
- Zhang, G. S., F. X. Zhang, and X. T. Li. 2019. "Effects of Polyester Microfibers on Soil Physical Properties: Perception from a Field and a Pot Experiment." *Science of The Total Environment* 670 (June): 1–7. <https://doi.org/10.1016/j.scitotenv.2019.03.149>.
- Zhang, Qiuge, Mengsai Zhao, Fansong Meng, Yongli Xiao, Wei Dai, and Yaning Luan. 2021. "Effect of Polystyrene Microplastics on Rice Seed Germination and Antioxidant Enzyme Activity." *Toxics* 9 (8): 179. <https://doi.org/10.3390/toxics9080179>.
- Zhang, Shaoliang, Xu Liu, Xinhua Hao, Jiuqi Wang, and Ying Zhang. 2020. "Distribution of Low-Density Microplastics in the Mollisol Farmlands of Northeast China." *Science of The Total Environment* 708 (March): 135091. <https://doi.org/10.1016/j.scitotenv.2019.135091>.
- Zhang, Shuwu, Shan Ren, Lei Pei, Yuhuan Sun, and Fayuan Wang. 2022. "Ecotoxicological Effects of Polyethylene Microplastics and ZnO Nanoparticles on Earthworm *Eisenia Fetida*." *Applied Soil Ecology* 176 (August): 104469. <https://doi.org/10.1016/j.apsoil.2022.104469>.
- Zhao, Tingting, Yudi M. Lozano, and Matthias C. Rillig. 2021. "Microplastics Increase Soil PH and Decrease Microbial Activities as a Function of Microplastic Shape, Polymer Type, and Exposure Time." *Frontiers in Environmental Science* 9 (June). <https://doi.org/10.3389/fenvs.2021.675803>.
- Zhou, Bianying, Jiaqing Wang, Haibo Zhang, Huahong Shi, Yufan Fei, Shunying Huang, Yazhi Tong, Dishu Wen, Yongming Luo, and Damià Barceló. 2020. "Microplastics in Agricultural Soils on the Coastal Plain of Hangzhou Bay, East China: Multiple Sources Other than Plastic Mulching Film." *Journal of Hazardous Materials* 388 (April): 121814. <https://doi.org/10.1016/j.jhazmat.2019.121814>.

- Zhou, Yanfei, Xiaoning Liu, and Jun Wang. 2019. "Characterization of Microplastics and the Association of Heavy Metals with Microplastics in Suburban Soil of Central China." *Science of The Total Environment* 694 (December): 133798. <https://doi.org/10.1016/J.SCITOTENV.2019.133798>.
- Zhu, Dong, Qing Fang Bi, Qian Xiang, Qing Lin Chen, Peter Christie, Xin Ke, Long Hua Wu, and Yong Guan Zhu. 2018. "Trophic Predator-Prey Relationships Promote Transport of Microplastics Compared with the Single Hypoaspis Aculeifer and Folsomia Candida." *Environmental Pollution* 235 (April): 150–54. <https://doi.org/10.1016/J.ENVPOL.2017.12.058>.
- Zhu, Dong, Qing Lin Chen, Xin Li An, Xiao Ru Yang, Peter Christie, Xin Ke, Long Hua Wu, and Yong Guan Zhu. 2018. "Exposure of Soil Collembolans to Microplastics Perturbs Their Gut Microbiota and Alters Their Isotopic Composition." *Soil Biology and Biochemistry* 116 (January): 302–10. <https://doi.org/10.1016/J.SOILBIO.2017.10.027>.
- Zhu, Fengxiao, Yuanyuan Yan, Evelyn Doyle, Changyin Zhu, Xin Jin, Zhanghao Chen, Chao Wang, Huan He, Dongmei Zhou, and Cheng Gu. 2022. "Microplastics Altered Soil Microbiome and Nitrogen Cycling: The Role of Phthalate Plasticizer." *Journal of Hazardous Materials* 427 (April): 127944. <https://doi.org/10.1016/j.jhazmat.2021.127944>.
- Zubris, Kimberly Ann V., and Brian K. Richards. 2005. "Synthetic Fibers as an Indicator of Land Application of Sludge." *Environmental Pollution* 138 (2): 201–11. <https://doi.org/10.1016/J.ENVPOL.2005.04.013>.
